# Supplementary material for: Evaluation and improvement of isothermal amplification methods for point-of-need plant disease diagnostics
Source: PubMed Central journal article supplement (PMC7323990; doi:10.1371/journal.pone.0235216), 2020-06-29

# Original Gel Images

**Title:**

Evaluation and improvement of isothermal amplification for point-of-need plant disease diagnostics

**Authors:**

Yiping Zou, Michael Glenn Mason, Jose Ramon Botella

**Author Affiliations:**

School of Agriculture and Food Sciences, The University of Queensland, Brisbane, QLD, Australia

**Corresponding authors:**

Email: [j.botella@uq.edu.au](mailto:j.botella@uq.edu.au) (JB) and [michael.mason@uq.edu.au](mailto:michael.mason@uq.edu.au) (MM)

Unless otherwise stated, original gel images were obtained by analysing amplification products on the 1% agarose gel containing 0.001% Ethidium Bromide Dye with the aid of BIO-RAD GelDoc. Original images used to generate final figures in main text and supporting information were included in this file and annotated using Adobe Illustrator with lanes not included in final figures labelled by "X".

**Fig 1**

Panel (A) and (D)

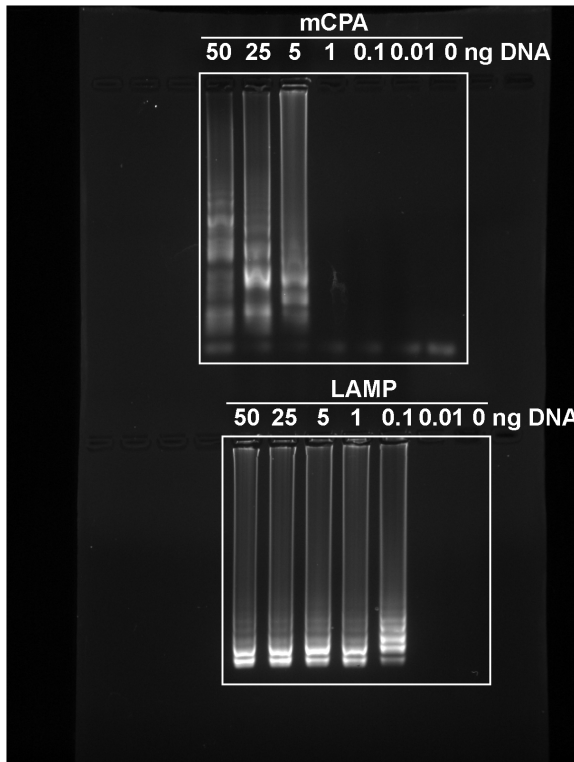

Panel (B) (RPA products were analysed on 2% agarose gel)

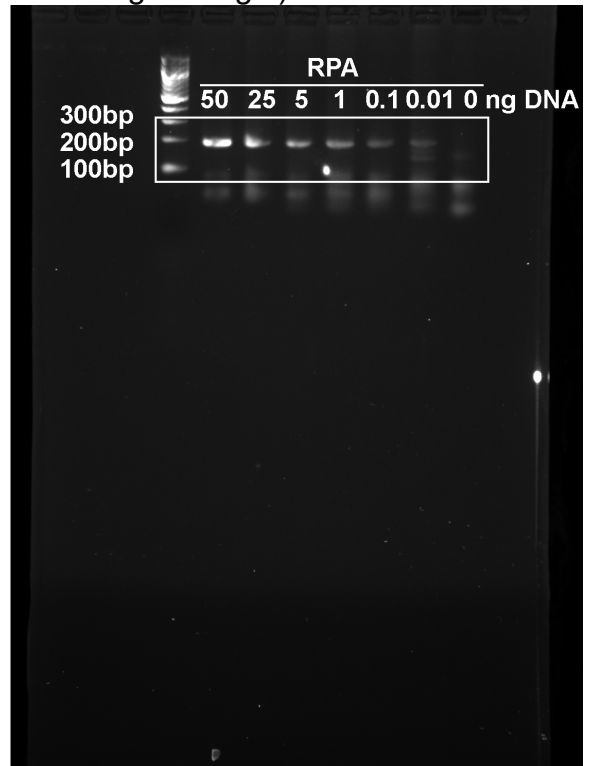

Panel (C)

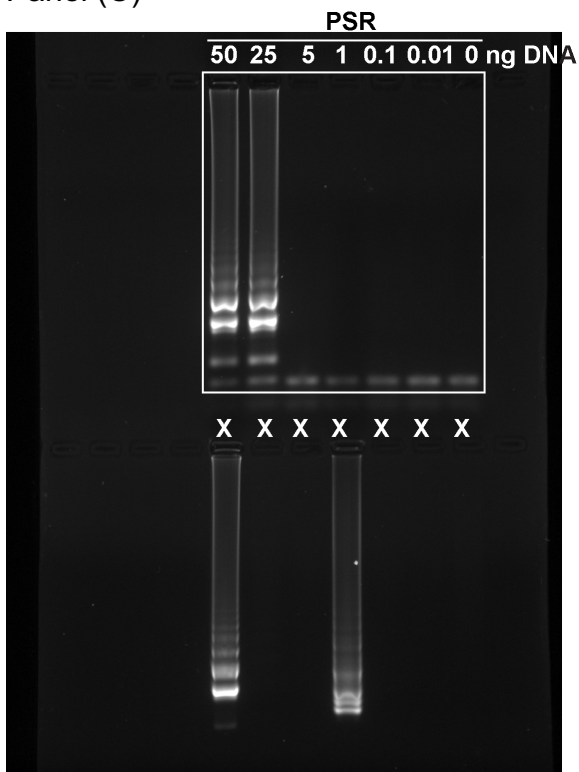

S2 Fig  
Panel (A)

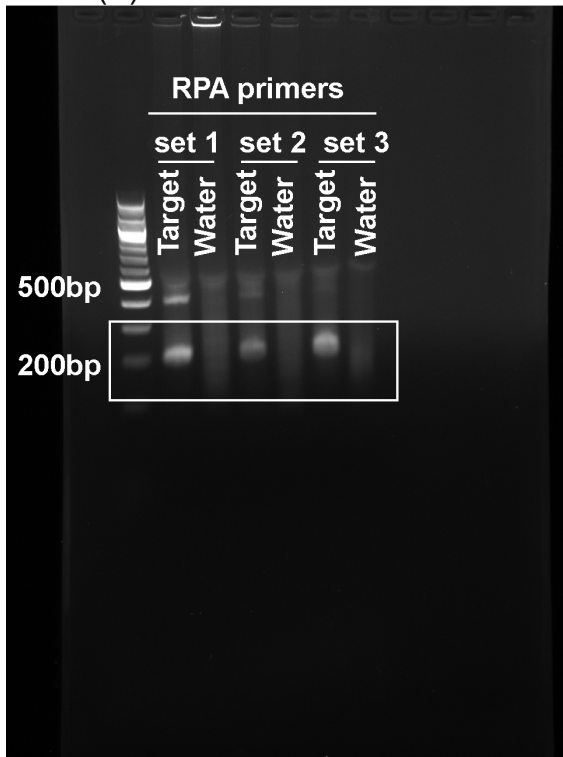

Panel (C)

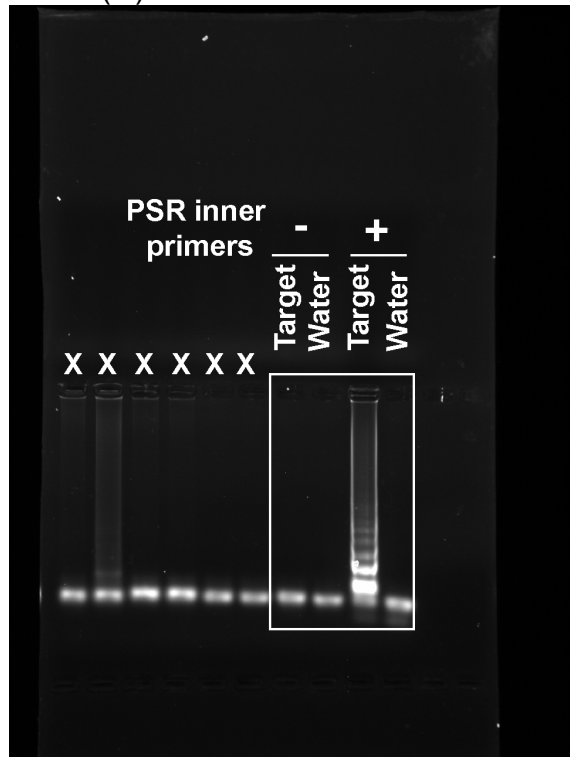

Panel (B)

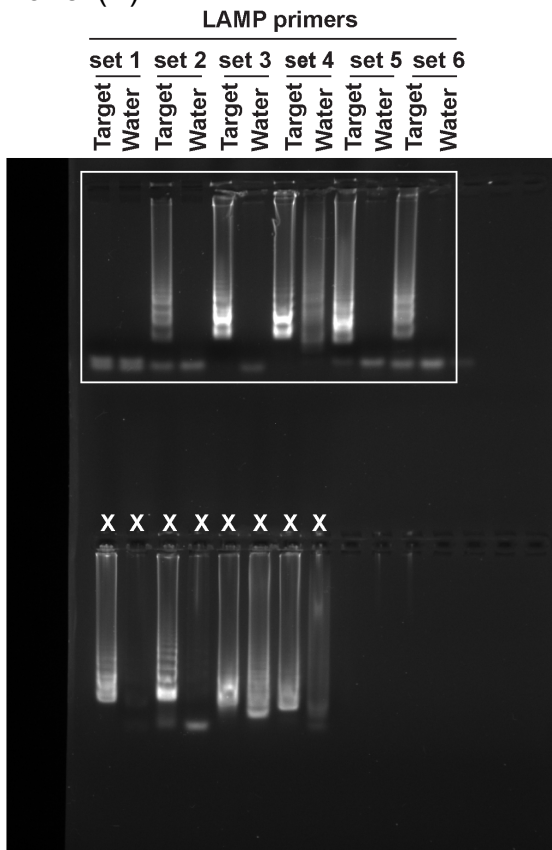

S3 Fig

Panel (A)

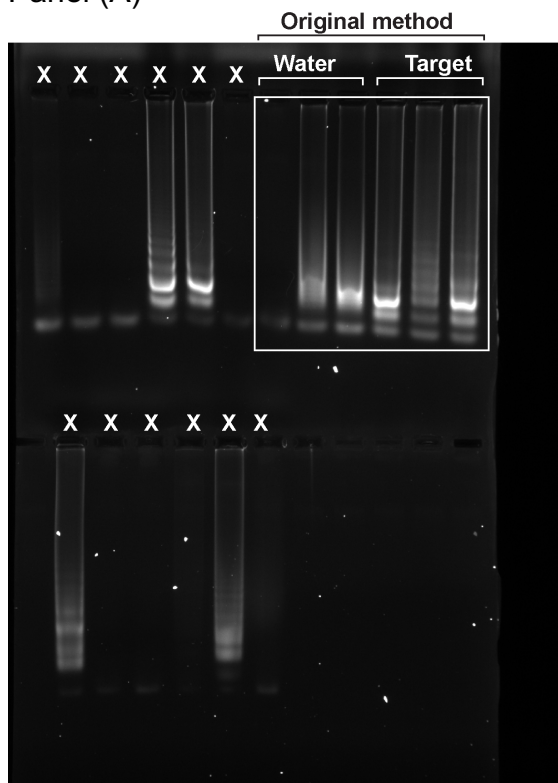

Panel (C)

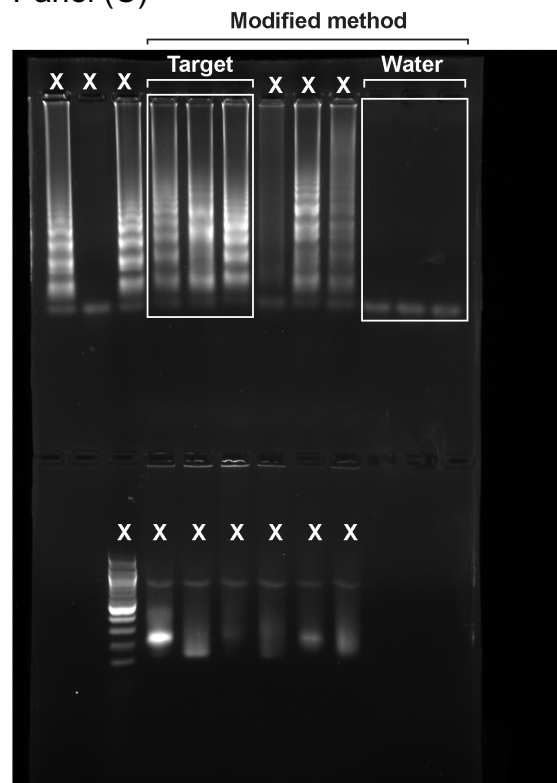

**S4 Fig** (Amplicons were analysed on 2% agarose gel)

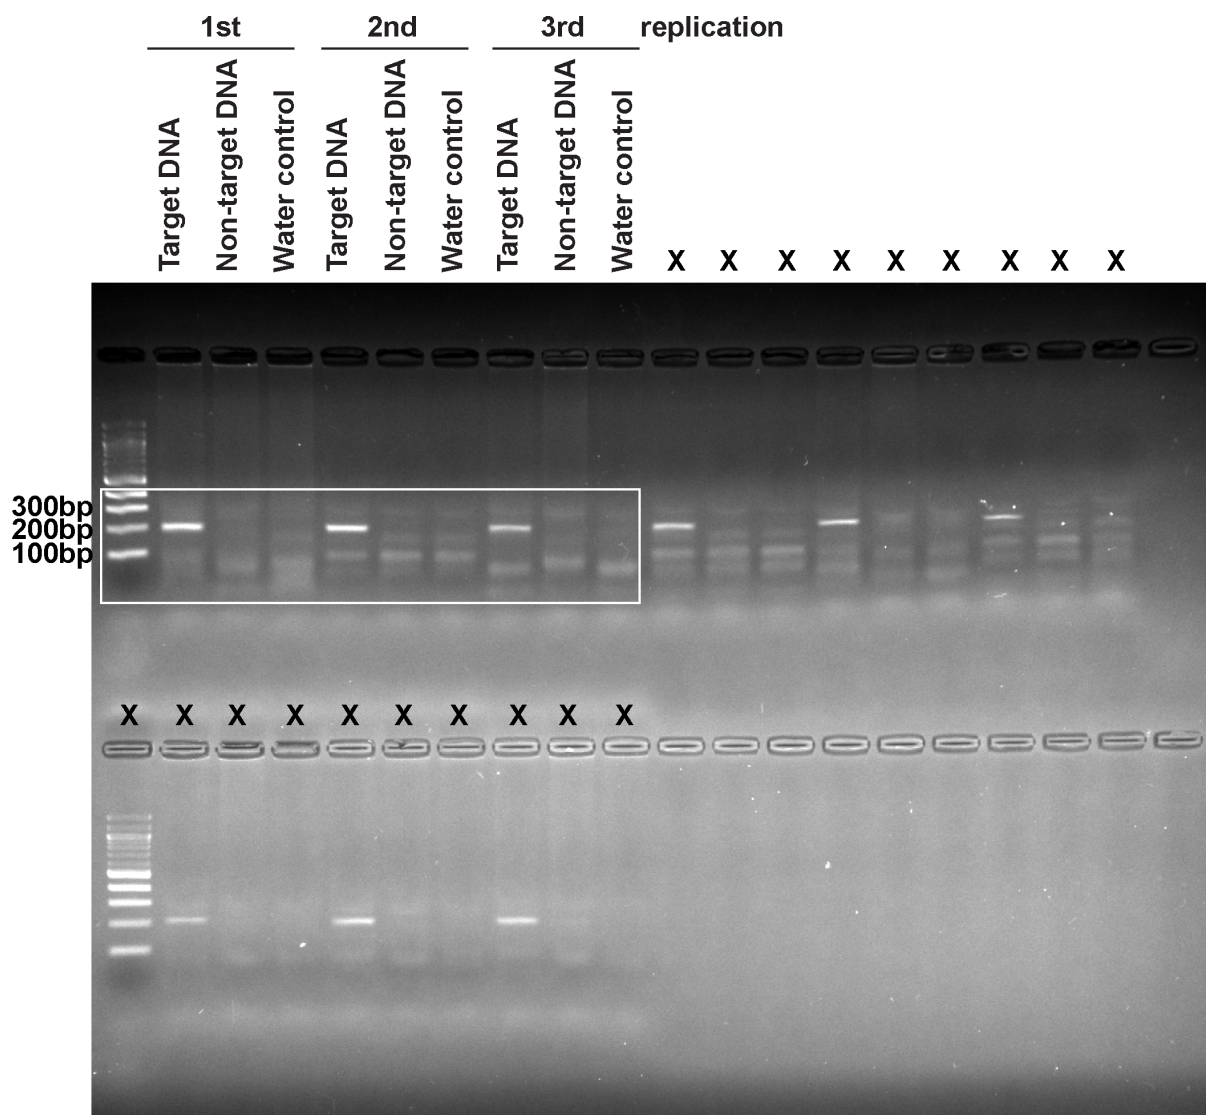

S6 Fig

Panel (A)

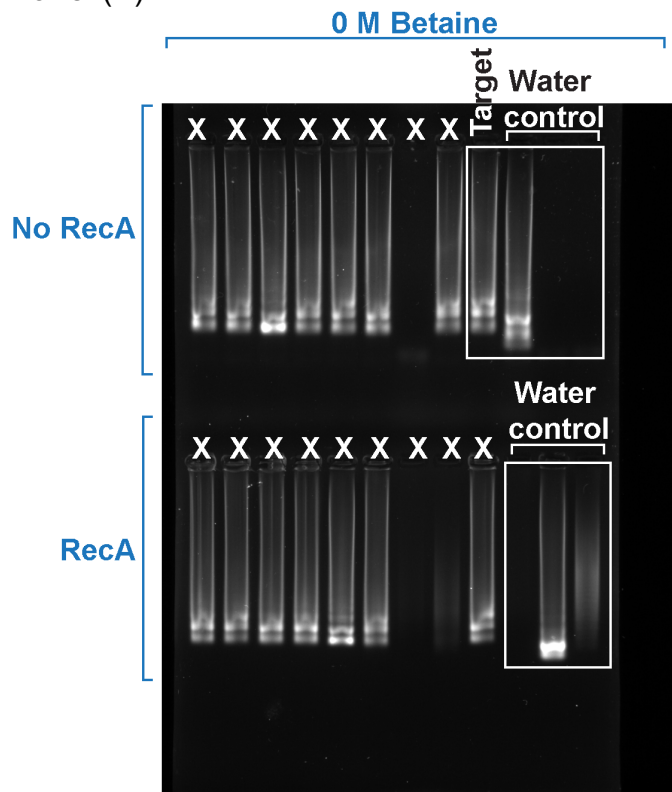

Panel (B)

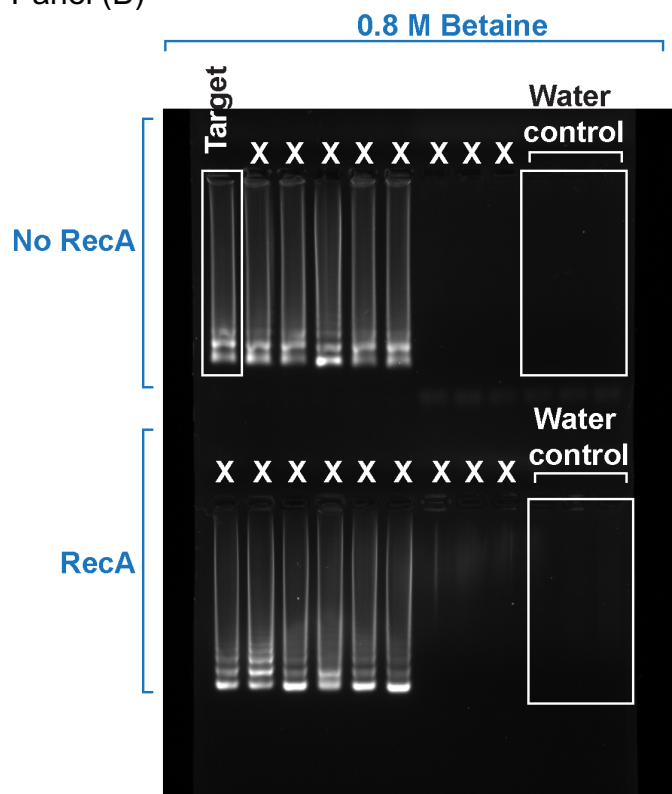

Supplement: pone.0235216.s010.pdf [file pone.0235216.s010.pdf]
